# Supplementary material for: Clinical efficacy analysis of Mucoperiosteal Flap Combined with Perforation Technique for tooth extraction in Medication-related osteonecrosis of the jaw risk population: A retrospective study
Source: Research Square preprint supplement (doi:10.21203/rs.3.rs-7003645/v1), 2025-07-29
Supplement: Supplementary file 1 [file 30d1513a3dad06bea28f3c96.docx]

**Table S1.** Classification of patients

| Classification | Patient characteristics |
| --- | --- |
| Low-dose anti-resorptive drug group (LDA) | Patients with non-neoplastic disease (mostly patients with primary or secondary osteoporosis, or those who are preventing osteoporosis) are treated with oral or intravenous medications. Common drugs include alendronate, etc. |
| High-dose anti-resorptive drug group (HDA) | Patients with bone metastatic lesions of malignant tumors or giant cell tumors of bone treated by intravenous or subcutaneous administration; common drugs include zoledronic Acid and Desutumab. |

Table **S2.** Clinical baseline data of patients with MRONJ after tooth extraction

| Number | Sex | Age | Primary disease | Systemic disease | Way of medicine | Duration of medication-yr | Medicine | Sites of tooth extraction | Indications | Unhealedsites |
| --- | --- | --- | --- | --- | --- | --- | --- | --- | --- | --- |
| 1 | Female | 60 | Breast cancer | diabetes | Intravenous injection | 7 | Zoledronicacid+  Anlotinib hydrochloride | 15\14\24\25\32\  42\48 | Periodontitis | 48 |
| 2 | Female | 65 | Brcast cancer | diabetes | Intravenous injection | 6 | Zoledronic acid | 36 | Periodontitis | 36 |

Patient 1 had an exposed jaw 1 month after surgery ,in patient 2 the mucosa showed obvious redness and swelling 2 months after surgery,and the fistula reached the bone surface.Both patients were diagnosed with MRONJ.
